# Supplementary material
Source: PubMed Central journal article supplement (PMC10315279)
Supplement: kiad208_supplementary_data.pdf [file kiad208_supplementary_data.pdf]

## Supplemental data

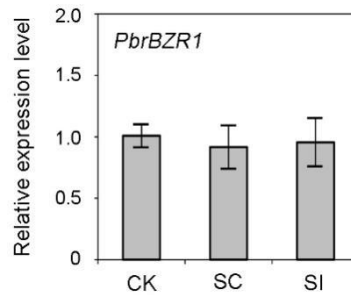

**Supplemental Figure S1.** *PbrBZR1* does not respond to SI at the transcription level.

CK, liquid germination medium; SC, compatible PbrS-RNase treatment; SI, incompatible PbrS-RNase treatment. Each sample contained 0.1 g of pollens, and the data are mean  $\pm$  standard deviation of three independent biological replicates.

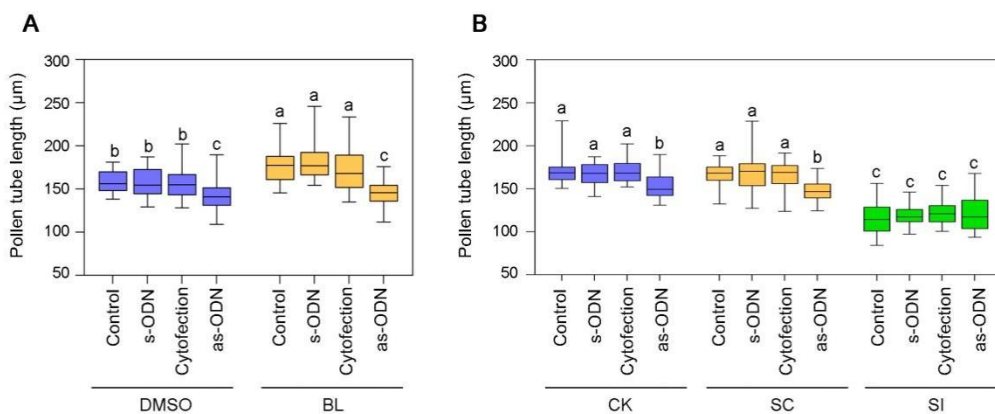

**Supplemental Figure S2.** Functional verification of PbrBZR1 in BR- and SI-mediated pollen tube growth.

(A) Length of *PbrBZR1*-suppressed pollen tubes grown on medium containing 100 nM BL. Center line, median; Box limits, upper and lower quartiles; Whiskers, 1.5  $\times$  interquartile range; Points, outliers. DMSO, add 100 nM DMSO to the pollen medium; BL, add 100 nM BL to the pollen medium. (B) Length of *PbrBZR1*-suppressed pollen tubes grown under SC and SI

treatment. Center line, median; Box limits, upper and lower quartiles; Whiskers, 1.5 × interquartile range; Points, outliers. CK, liquid germination medium; SC, compatible PbrS-RNase treatment; SI, incompatible PbrS-RNase treatment. For (A) and (B), at least 100 pollen tubes were measured per replicate in each treatment. All treatments were performed in three independent biological replicates. Different letters indicate significant differences as determined by Tukey’s HSD test ( $P < 0.05$ ).

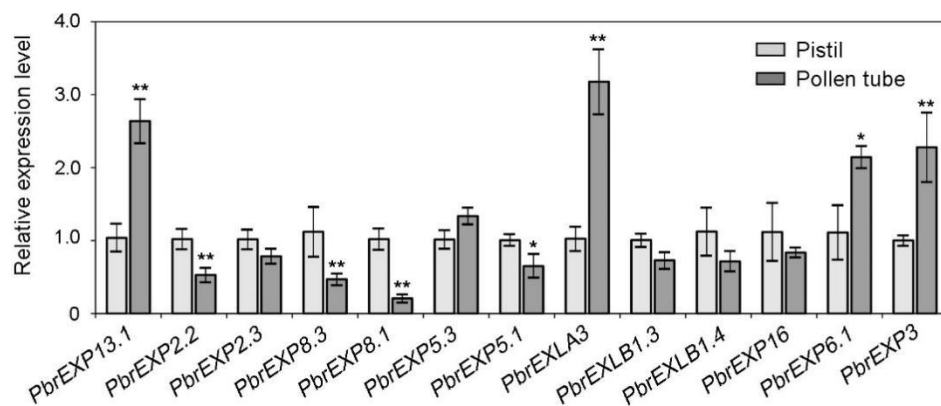

**Supplemental Figure S3.** Transcript levels of expansin genes in “Cuiguan” pear pistil and pollen.

Data are mean ± standard deviation of three independent biological replicates. Asterisks denote significant differences according to Tukey’s HSD test (\* $P < 0.05$ , \*\* $P < 0.01$ ).

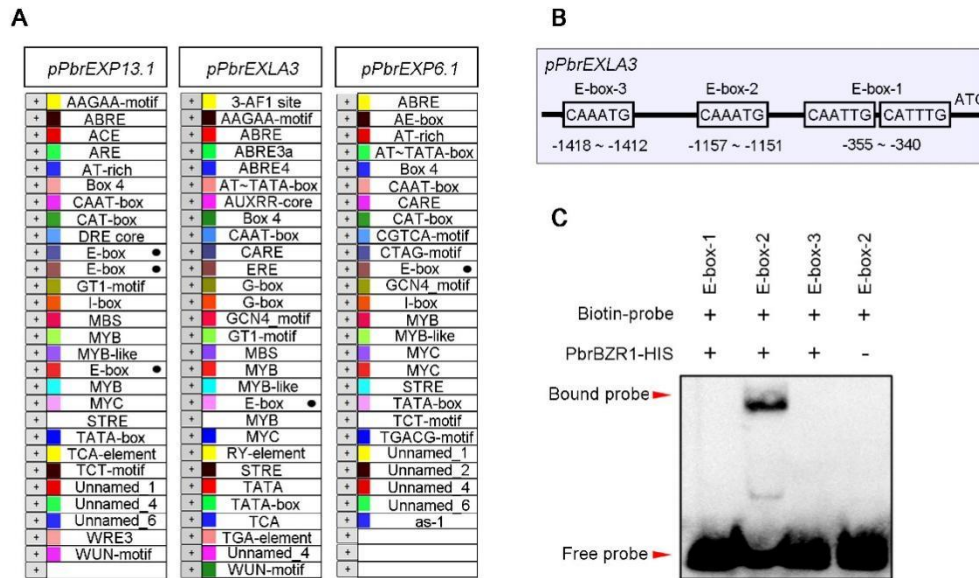

**Supplemental Figure S4.** PbrBZR1 binds to the promoter of *PbrEXLA3*.

(A) Analysis of promoter elements in *PbrEXP13.1*, *PbrEXLA3*, and *PbrEXP6.1*.

(B) Schematic showing distribution of E-box elements in *PbrEXLA3* promoter.

(C) Binding of PbrBZR1 protein to E-box element in the *PbrEXLA3* promoter as detected by EMSA.

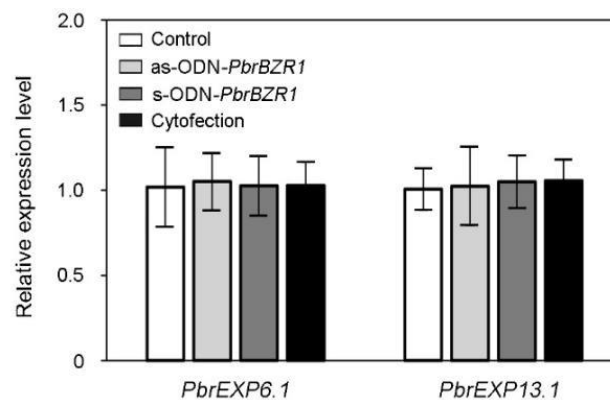

**Supplemental Figure S5.** Transcript levels of *PbrEXP6.1* and *PbrEXP13.1* in

*PbrBZR1*-suppressed pollen tubes. Each sample contained 0.1 g of pollens, and the data are mean  $\pm$  standard deviation of three independent biological replicates.

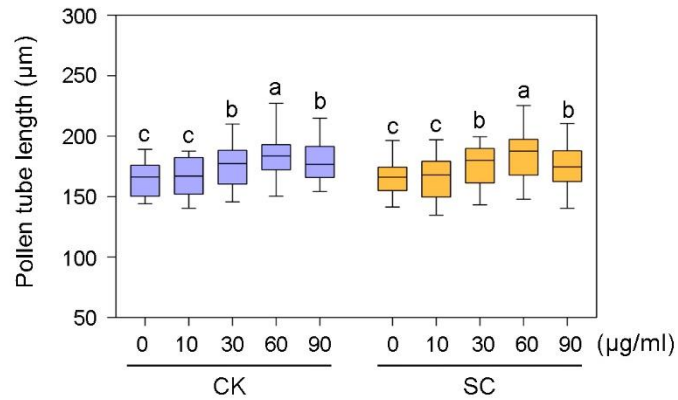

**Supplemental Figure S6.** Length of SC-treated pollen tubes grown on medium containing different concentrations of PbrEXLA3-HIS fusion protein. Center line, median; Box limits, upper and lower quartiles; Whiskers, 1.5 × interquartile range; Points, outliers. CK, liquid germination medium; SC, compatible PbrS-RNase treatment. At least 100 pollen tubes were measured per replicate in each treatment. All treatments were performed in three independent biological replicates. Different letters indicate significant differences as determined by Tukey's HSD test ( $P < 0.05$ ).

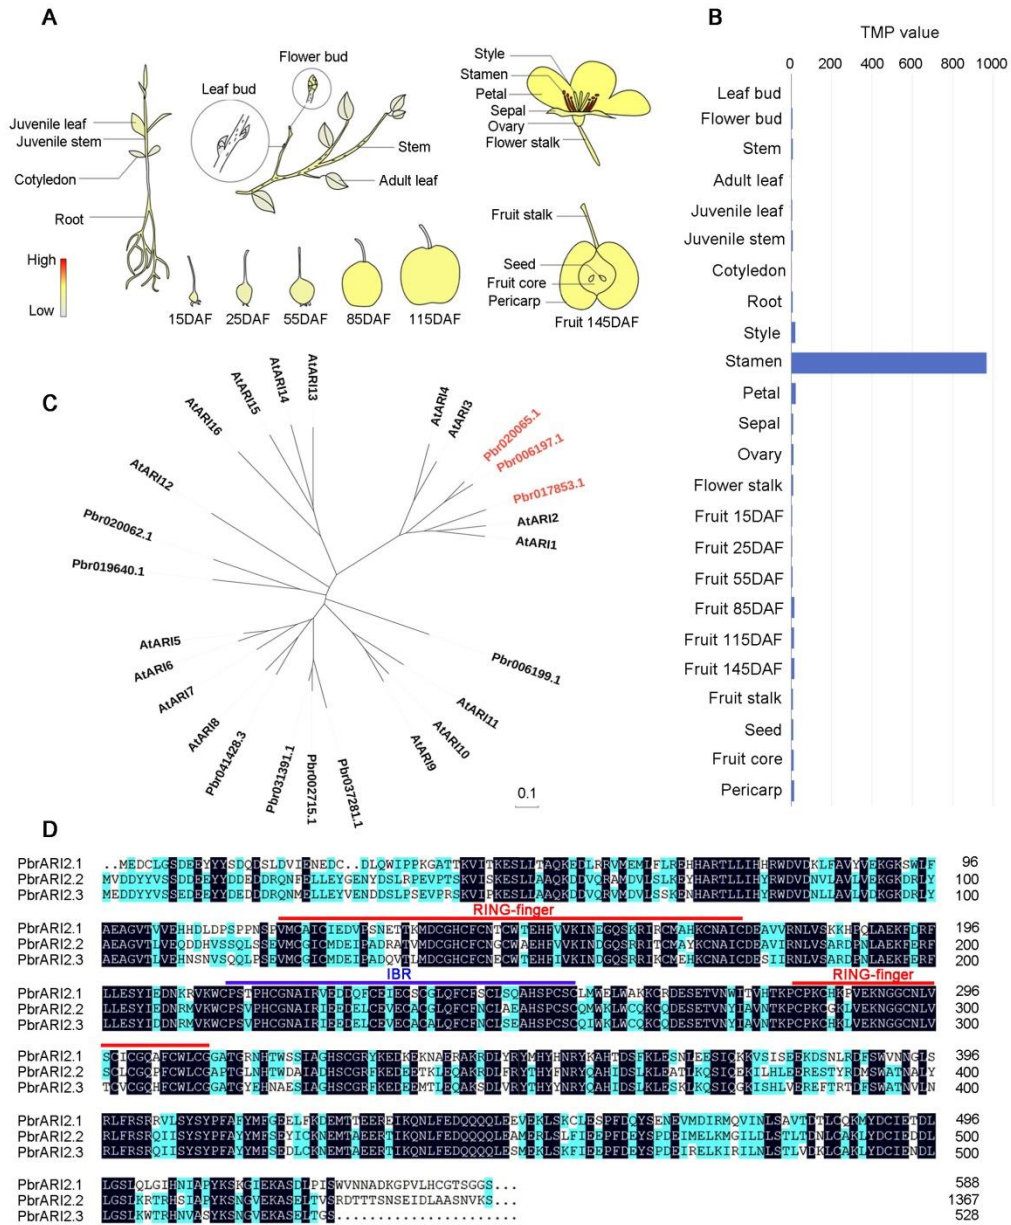

**Supplemental Figure S7.** Identification of *PbrARI2.3* in pear.

(A) Heatmap and (B) histogram showing *PbrARI2.3* transcript levels in different organs of pear. Data were obtained from Pear Expression Database (<http://www.peardb.org.cn/>). (C) Phylogenetic analysis of ARI proteins from *Arabidopsis* and pear, generated in MEGA 7 with the neighbor-joining method. The scale bar indicates the branch length. (D) Aligned amino acid sequences of three PbrARI proteins containing an IBR domain (215–257 aa) between two

RING-finger motifs (124–168 aa; 284–312 aa).

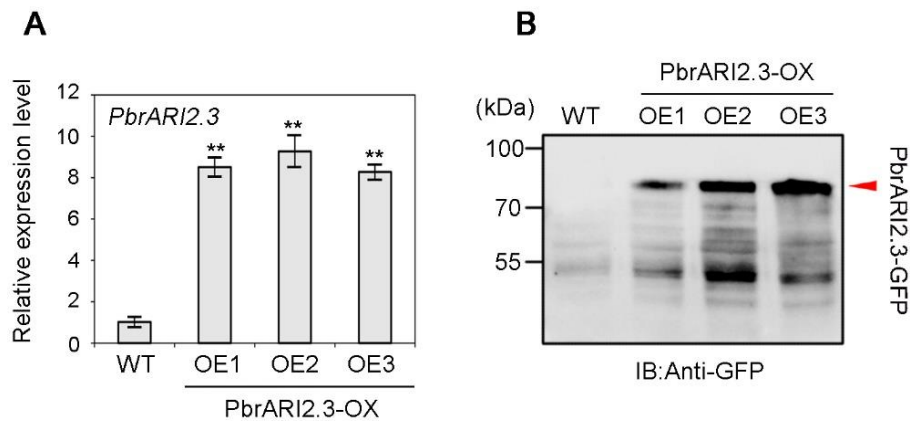

**Supplemental Figure S8.** Identification of *PbrARI2.3*-overexpressing transgenic pear calli.

(A) *PbrARI2.3* transcript levels in WT and three lines of *PbrARI2.3*-overexpressing (OE1, OE2, and OE3) as determined by RT-qPCR analyses. Data are mean  $\pm$  standard deviation of three independent biological replicates. Asterisks denote significant differences according to Tukey's HSD test (\*\* $P < 0.01$ ). (B) Presence of the transgene in *PbrARI2.3*-overexpressing calli as confirmed by western blotting with anti-GFP. The experiments were performed three times with similar results, and a representative picture is shown.

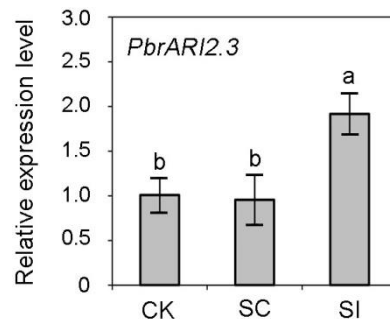

**Supplemental Figure S9.** *PbrARI2.3* responds to SI at the transcriptional level. CK, liquid germination medium; SC, compatible PbrS-RNase treatment;

SI, incompatible PbrS-RNase treatment. Data are mean  $\pm$  standard deviation of three independent biological replicates. Different letters indicate significant differences as determined by Tukey's HSD test ( $P < 0.05$ ).

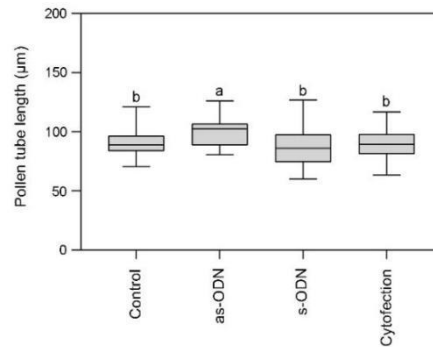

**Supplemental Figure S10.** Length of *PbrAR12.3*-suppressed pollen tubes grown under SC treatment. Center line, median; Box limits, upper and lower quartiles; Whiskers, 1.5  $\times$  interquartile range; Points, outliers. At least 100 pollen tubes were measured per replicate in each treatment. All treatments were performed in three independent biological replicates. Different letters indicate significant differences as determined by Tukey's HSD test ( $P < 0.05$ ).

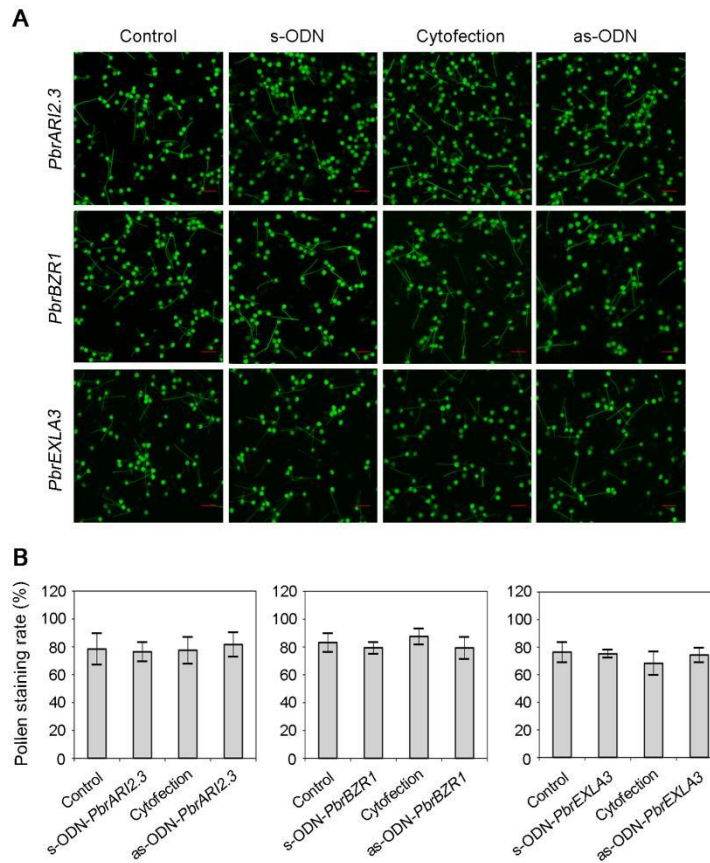

**Supplemental Figure S11.** Detection of pollen viability after as-ODN treatments.

(A) FDA staining of as-ODN-*PbrARI2.3*, as-ODN-*PbrBZR1*, and as-ODN-*PbrEXLA3* treated pear pollen at 2.5 h. Bars = 100  $\mu$ m. (B) Statistics of pollen staining rate. At least 100 pollen tubes were measured per replicate in each treatment. Data are mean  $\pm$  standard deviation of three independent biological replicates.

**Supplemental Table S1.** Differentially expressed expansin genes after pollination.

| GeneID             | FPKM values |          |          |          |          |          |
|--------------------|-------------|----------|----------|----------|----------|----------|
|                    | CP24h       | CP48h    | CP72h    | SP24h    | SP48h    | SP72h    |
| <b>Pbr012636.1</b> | 6.299794    | 6.711144 | 3.914175 | 4.070464 | 5.758334 | 3.059617 |



|                    |          |          |          |          |          |          |
|--------------------|----------|----------|----------|----------|----------|----------|
| <b>Pbr013129.1</b> | 105.0993 | 94.79531 | 63.31297 | 132.4519 | 121.6789 | 69.2321  |
| <b>Pbr017279.1</b> | 232.338  | 249.9839 | 283.1354 | 239.5693 | 425.081  | 231.7547 |
| <b>Pbr002929.1</b> | 32.29454 | 64.5802  | 62.93233 | 75.16617 | 51.27522 | 68.91439 |
| <b>Pbr003748.1</b> | 104.1606 | 153.87   | 123.5764 | 116.0598 | 178.3124 | 176.3387 |
| <b>Pbr019282.1</b> | 11.02273 | 12.95697 | 3.592858 | 7.984577 | 7.571882 | 1.007222 |
| <b>Pbr039073.1</b> | 241.7725 | 328.3371 | 208.3292 | 246.2742 | 313.2665 | 166.4599 |
| <b>Pbr033313.1</b> | 17.45234 | 15.50991 | 11.73893 | 10.44614 | 7.241533 | 6.01985  |
| <b>Pbr013752.1</b> | 5.711068 | 3.939028 | 1.949116 | 2.606304 | 1.548849 | 1.427734 |
| <b>Pbr022160.1</b> | 9.768462 | 9.348018 | 9.981355 | 5.256199 | 4.139792 | 3.291827 |
| <b>Pbr009385.1</b> | 0.587197 | 2.604321 | 1.063963 | 2.553364 | 7.059518 | 7.928769 |
| <b>Pbr003883.1</b> | 420.2582 | 383.0673 | 111.8454 | 318.4312 | 218.4479 | 149.1841 |
| <b>Pbr033539.1</b> | 50.31034 | 45.08289 | 24.03397 | 29.48638 | 33.13551 | 15.28466 |

**Supplemental Table S2. Primers used to analyze gene expression and construct vectors.**

| <b>RT-qPCR assays</b> |                         |
|-----------------------|-------------------------|
| PbrBZR1-F:            | TTCCCAACTGGGACTCCATC    |
| PbrBZR1-R:            | GGCAGCTGGAGGATGAGTAT    |
| PbrEXP13.1-F:         | GGCTACGGAGACCTCGAGAA    |
| PbrEXP13.1-R:         | GTTGGTCGCCGTCACGATAA    |
| PbrEXP2.2-F:          | ACAATGGCGGATGGTGAAT     |
| PbrEXP2.2-R:          | TAGGAGTGGCCGTTGATGGT    |
| PbrEXP2.3-F:          | ACAATGGCGGATGGTGAAT     |
| PbrEXP2.3-R:          | TAGGAGTGGCCGTTGATGGT    |
| PbrEXP8.3-F:          | CACAAACGTGGGAGGAGCAG    |
| PbrEXP8.3-R:          | CGTCGCTGGTAGTGACTIONTGG |
| PbrEXP8.1-F:          | TGATCACGAACGTCGGAGGA    |
| PbrEXP8.1-R:          | TGTTGGCGGTGAGAGTTCTG    |
| PbrEXP5.3-F:          | ACAGCCAGGGTTATGGGACT    |
| PbrEXP5.3-R:          | GGGCAGAAGTTTGTGGCAGT    |

|                                        |                                                       |                                                                   |
|----------------------------------------|-------------------------------------------------------|-------------------------------------------------------------------|
| PbrEXP5.1-F:                           | CCGGTGATGTGCACTCTGTT                                  |                                                                   |
| PbrEXP5.1-R:                           | AGGTCTGCCCAAAGGACCAT                                  |                                                                   |
| PbrEXLA3-F:                            | TGCAACTGCTTGTGATCGCT                                  |                                                                   |
| PbrEXLA3-R:                            | CCACAACCAGCTCCACCTTT                                  |                                                                   |
| PbrEXLB1.3-F:                          | CGCTTGCAGGTTCTCTGGTT                                  |                                                                   |
| PbrEXLB1.3-R:                          | CTCCATTGCTCGCGATCCTC                                  |                                                                   |
| PbrEXLB1.4-F:                          | ACCAATCCAGCTTCGTCTGC                                  |                                                                   |
| PbrEXLB1.4-R:                          | TCCTGCCAAACCTCAACAGC                                  |                                                                   |
| PbrEXP16-F:                            | TCCTGCCAAACCTCAACAGC                                  |                                                                   |
| PbrEXP16-R:                            | GGACTGCCAGATTTGCACCA                                  |                                                                   |
| PbrEXP6.1-F:                           | GGGATCGTCCCTGTTGCCTA                                  |                                                                   |
| PbrEXP6.1-R:                           | ATGCTCATCCAGCCAGTCCT                                  |                                                                   |
| PbrEXP3-F:                             | TGCGGGTACGGAAACCTCTA                                  |                                                                   |
| PbrEXP3-R:                             | TGGGCTGAGCGAAGTTAGGA                                  |                                                                   |
| <b>Y1H assays</b>                      |                                                       |                                                                   |
| pHIS2-PbrEXP13.1-F                     | TACGACTCACTATAGGGCGAATTCTA<br>CATTGCATGGTAAGATAC      | pHIS2 vector restriction enzyme sites:<br>EcoRI, SacI.            |
| pHIS2-PbrEXP13.1-R                     | GATCGATTTCGCGAACGCGTGAGCTC<br>TTCTGGGCTTGTTTGTGTTG    | Plasmid construction by homologous recombination.                 |
| pHIS2-PbrEXLA3-F                       | TACGACTCACTATAGGGCGAATTCC<br>CGCGGAATATCTTGTTGAT      | pHIS2 vector restriction enzyme sites:<br>EcoRI, SacI.            |
| pHIS2-PbrEXLA3-R                       | GATCGATTTCGCGAACGCGTGAGCTC<br>AAACTTTTTGAACCTTTTAGGAC | Plasmid construction by homologous recombination.                 |
| pHIS2-PbrEXP6.1-F                      | TACGACTCACTATAGGGCGAATTCA<br>GTGTTACTATTTTACCCAA      | pHIS2 vector restriction enzyme sites:<br>EcoRI, SacI.            |
| pHIS2-PbrEXP6.1-R                      | GATCGATTTCGCGAACGCGTGAGCTC<br>TAGCGAGATTAGTAGAGT      | Plasmid construction by homologous recombination.                 |
| <b>Dual-luciferase reporter assays</b> |                                                       |                                                                   |
| pGreenII<br>-pPbrEXLA3-F               | CTATAGGGCGAATTGGGTACCCCGC<br>GGAATATCTTGTTGAT         | pGreenII 0800-LUC vector restriction enzyme sites: KpnI, HindIII. |
| pGreenII<br>-pPbrEXLA3-R               | CAGGAATTCGATATCAAGCTTAAACT<br>TTTTGAACCTTTTAGGAC      | Plasmid construction by homologous recombination.                 |

|                        |                                                      |                                                                    |
|------------------------|------------------------------------------------------|--------------------------------------------------------------------|
| pGreenII<br>-PbrBZR1-F | GCGGCCGCTCTAGAACTAGTGGATC<br>CATGACGTCGGATGGGGCAAC   | pGreenII 62-SK vector restriction<br>enzyme sites: BamHI, HindIII. |
| pGreenII<br>-PbrBZR1-R | CTCGAGGTCGACGGTATCGATAAGC<br>TTAATCCGAGCCTTACCATTCCA | Plasmid construction by homologous<br>recombination.               |
| <b>Y2H assays</b>      |                                                      |                                                                    |
| pGAD-PbrARI2.1-<br>F   | GCCATGGAGGCCAGTGAATTCATGG<br>AGGATTGCTTGGG           | pGADT7 vector restriction enzyme<br>sites: EcoRI, BamHI.           |
| pGAD-PbrARI2.1-<br>R   | CAGCTCGAGCTCGATGGATCCTGAA<br>TCAGATCTGTCAACCTCT      | Plasmid construction by homologous<br>recombination.               |
| pGAD-PbrARI2.2-<br>F   | GCCATGGAGGCCAGTGAATTCATGG<br>TGGACGATTATTACG         | pGADT7 vector restriction enzyme<br>sites: EcoRI, BamHI.           |
| pGAD-PbrARI2.2-<br>R   | CAGCTCGAGCTCGATGGATCCTCAT<br>GGTAGCCAAAAGGTCTCTC     | Plasmid construction by homologous<br>recombination.               |
| pGAD-PbrARI2.3-<br>F   | GCCATGGAGGCCAGTGAATTCATGG<br>AGGACGATTATTACG         | pGADT7 vector restriction enzyme<br>sites: EcoRI, BamHI.           |
| pGAD-PbrARI2.3-<br>R   | CAGCTCGAGCTCGATGGATCCTGGA<br>ACCGTAAGTTCTGAAGC       | Plasmid construction by homologous<br>recombination.               |
| pGBD-PbrBZR1-<br>F     | ATGGCCATGGAGGCCGAATTCATGA<br>CGTCGGATGGGGCAAC        | pGBKT7 vector restriction enzyme sites:<br>EcoRI, BamHI.           |
| pGBD-PbrBZR1-<br>R     | CCGCTGCAGGTCGACGGATCCAATC<br>CGAGCCTTACCATTCCA       | Plasmid construction by homologous<br>recombination.               |
| <b>BIFC assays</b>     |                                                      |                                                                    |
| YFPN-PbrBZR1-F         | GAGAACACGGGGGACTCTAGAATGA<br>CGTCGGATGGGGCAAC        | pSPYNE vector restriction enzyme<br>sites: XbaI, BamHI.            |
| YFPN-PbrBZR1-<br>R     | GACAGTACTATCGATGGATCCAATC<br>CGAGCCTTACCATTCCA       | Plasmid construction by homologous<br>recombination.               |
| YFPC-PbrARI2.3-<br>F   | GAGAACACGGGGGACTCTAGAATGG<br>AGGACGATTATTACG         | pSPYCE vector restriction enzyme<br>sites: XbaI, BamHI.            |
| YFPC-PbrARI2.3-<br>R   | GACAGTACTATCGATGGATCCTGGA<br>ACCGTAAGTTCTGAAGC       | Plasmid construction by homologous<br>recombination.               |
|                        |                                                      |                                                                    |

| <b>LCI assays</b>             |                                                        |                                                                        |
|-------------------------------|--------------------------------------------------------|------------------------------------------------------------------------|
| Nluc-PbrBZR1-F                | CTCGGTACCCGGGGATCCATGACGT<br>CGGATGGGGCAAC             | pCAMBIA1300-NLuc vector restriction<br>enzyme sites: BamHI, Sall.      |
| Nluc-PbrBZR1-R                | GTACGAGATCTGGTCGACAATCCGA<br>GCCTTACCATTCCA            | Plasmid construction by homologous<br>recombination.                   |
| Cluc-PbrARI2.3-F              | GCGTCCCGGGCGGTACCATGGAG<br>GACGATTATTACG               | pCAMBIA1300-CLuc vector restriction<br>enzyme sites:KpnI, BamHI.       |
| Cluc-PbrARI2.3-R              | AGTCCATTTGTTGGATCCGGAACCG<br>GTAAGTTCTGAAGC            | Plasmid construction by homologous<br>recombination.                   |
| <b>Co-IP assays</b>           |                                                        |                                                                        |
| pEarlyGate-PbrB<br>ZR1-F      | CTTAATTAATCTAGAGAATTCATGAC<br>GTCGGATGGGGCAAC          | pEarlyGate201-HA vector restriction<br>enzyme sites:EcoRI, BamHI.      |
| pEarlyGate-PbrB<br>ZR1-R      | ATGGTAACCTGCCATGGATCCAATC<br>CGAGCCTTACCATTCCA         | Plasmid construction by homologous<br>recombination.                   |
| pEarlyGate-PbrA<br>RI2.3-F    | CGCTTAGAACTAGTGGATCCATGG<br>AGGACGATTATTACG            | pEarlyGate202-FLAG vector restriction<br>enzyme sites: BamHI, HindIII. |
| pEarlyGate-PbrA<br>I2.3-R     | GTCGACGGTATCGATAAGCTTGGAA<br>CCGGTAAGTTCTGAAGC         | Plasmid construction by homologous<br>recombination.                   |
| <b>Prokaryotic expression</b> |                                                        |                                                                        |
| pET-32a-PbrBZR<br>1-F         | CAAGGCCATGGCTGATATCGGATCC<br>ATGACGTCGGATGGGGCAAC      | pET-32a vector restriction enzyme sites:<br>BamHI, EcoRI.              |
| pET-32a-PbrBZR<br>1-R         | TGTCGACGGAGCTCGAATTCAATCC<br>GAGCCTTACCATTCCA          | Plasmid construction by homologous<br>recombination.                   |
| pET-32a-PbrEXL<br>A3-F        | CAAGGCCATGGCTGATATCGGATCC<br>ATGTCTTTGTTTATTTGCTTCCTCC | pET-32a vector restriction enzyme sites:<br>BamHI, EcoRI.              |
| pET-32a-PbrEXL<br>A3-R        | TGTCGACGGAGCTCGAATTCTATCC<br>AGCTCCCATCATCACAG         | Plasmid construction by homologous<br>recombination.                   |
| pGEX-4T-PbrARI<br>2.3-F       | CTGGTTCCGCGTGGATCCATGGAGG<br>ACGATTATTACG              | pGEX-4T-1 vector restriction enzyme<br>sites: BamHI, EcoRI.            |
| pGEX-4T-PbrARI<br>2.3-R       | GAGTCGACCCGGGAATTCGGAACCG<br>GTAAGTTCTGAAGC            | Plasmid construction by homologous<br>recombination.                   |
|                               |                                                        |                                                                        |

|                                         |                                                      |                                                           |
|-----------------------------------------|------------------------------------------------------|-----------------------------------------------------------|
| pET-32a-PbrS <sub>3</sub> -R<br>Nase-F  | GCCATGGCTGATATCGGATCCATGC<br>AATTTACGCAGCAATATCA     | pET-32a vector restriction enzyme sites:<br>BamHI, EcoRI. |
| pET-32a-PbrS <sub>3</sub> -R<br>Nase-R  | TTGTCGACGGAGCTCGAATTCATACT<br>TGATATTGTTGGTGGGGC     | Plasmid construction by homologous recombination.         |
| pET-32a-PbrS <sub>5</sub> -R<br>Nase-F  | GCCATGGCTGATATCGGATCCATGT<br>ATTTTCAATTTACGCAGCAAT   | pET-32a vector restriction enzyme sites:<br>BamHI, EcoRI. |
| pET-32a-PbrS <sub>5</sub> -R<br>Nase-R  | TTGTCGACGGAGCTCGAATTCATACT<br>TGATATTGTTGGTGGGGC     | Plasmid construction by homologous recombination.         |
| pET-32a-PbrS <sub>7</sub> -R<br>Nase-F  | GCCATGGCTGATATCGGATCCATGT<br>ACGATTATTTTCAATTTACGCA  | pET-32a vector restriction enzyme sites:<br>BamHI, EcoRI. |
| pET-32a-PbrS <sub>7</sub> -R<br>Nase-R  | TTGTCGACGGAGCTCGAATTCATACT<br>TAACATCGGCCGGGC        | Plasmid construction by homologous recombination.         |
| pET-32a-PbrS <sub>34</sub> -<br>RNase-F | GCCATGGCTGATATCGGATCCATGT<br>ACGATTATTTTCAATTTACGCA  | pET-32a vector restriction enzyme sites:<br>BamHI, EcoRI. |
| pET-32a-PbrS <sub>34</sub> -<br>RNase-R | TTGTCGACGGAGCTCGAATTCATACT<br>GAATACTATTGTTTGGGCAAAA | Plasmid construction by homologous recombination.         |
| <b>Genetic transformation</b>           |                                                      |                                                           |
| pRI101-PbrARI2.<br>3-F                  | GTTGATACATATGCCCGTCGACATG<br>GAGGACGATTATTACG        | pRI101 vector restriction enzyme sites:<br>Sall, SmaI.    |
| pRI101-PbrARI2.<br>3-R                  | TCAGAATTCGGTACCCCCGGGGGAA<br>CCGGTAAGTTCTGAAGC       | Plasmid construction by homologous recombination.         |
| <b>Phosphorothioated ODNs sequences</b> |                                                      |                                                           |
| PbrBZR1                                 | GAAGCAAACCCATTGGCCGGAATCG                            |                                                           |
| PbrEXLA3                                | GTGATCTGAACCTTTGTGTCATATA                            |                                                           |
| PbrARI2.3                               | TTGCATAGATCTTCGCTAAACATGT                            |                                                           |

### Supplemental Table S3. Primers used to synthesize EMSA probes.

| EMSA         |                                      |
|--------------|--------------------------------------|
| E-box-1      | AACTTCTTGTTTCATTTGAGTCATTTGAATTCCAAA |
| E-box-2      | TCCAGAATTTTGGCACATGCGCATGGTCCATACG   |
| E-box-3      | CTGAGTTTGCTACACATGTATTTACACATAAAA    |
| E-box-2(mut) | TCCAGAATTTTGGAAAAACGCATGGTCCATACG    |
